# Supplementary material for: Combined effects of osmotic and hydrostatic pressure on multilamellar lipid membranes in the presence of PEG and trehalose
Source: Royal Society of Chemistry journal article supplement (doi:10.1039/c8sm01343h), 2018-01-01
Supplement: c8sm01343h1.pdf [file c8sm01343h1.pdf]

## Supplementary Information

### Additional Figures

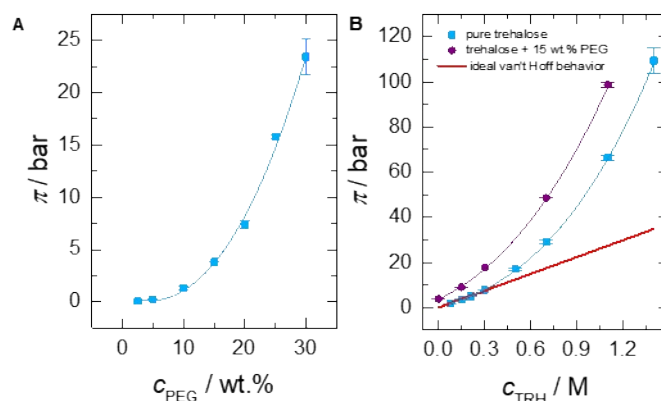

**Fig. SI 1:** Osmotic pressure of PEG (A) and trehalose (B) solutions at 35 °C. The red line indicates the ideal van't Hoff behavior, the blue and violet lines are shown as guides to the eyes only.

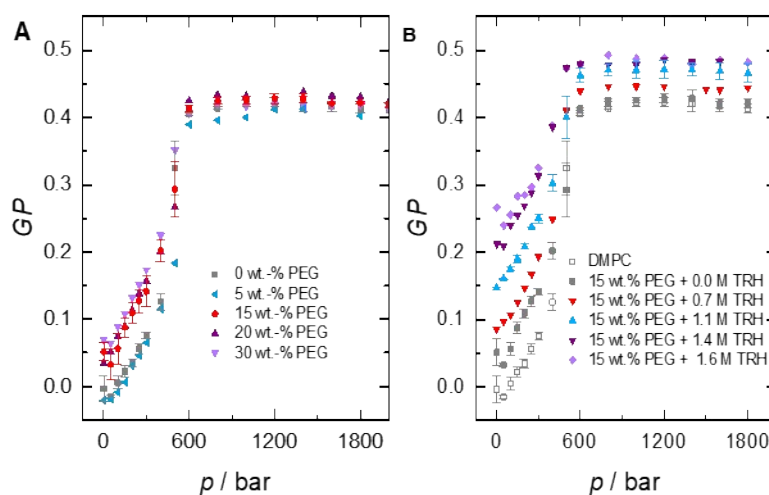

**Fig. SI 2:** Pressure ( $T = 35^\circ\text{C}$ ) dependence of the Generalized Polarization of Laurdan incorporated into multilamellar DMPC vesicles in the absence and presence of PEG and trehalose.

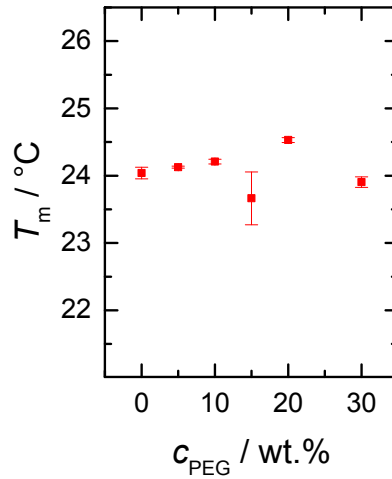

**Fig. SI 3:** Influence of PEG on the temperature-induced gel-to-fluid phase transition, derived from the DSC data.

### Additional Tables

**Table SI 1:** Mean deviation of the Caillé analysis of the data at 35 °C and 1 bar obtained at the SAXSess mc<sup>2</sup> instrument.

|          | DMPC  | DMPC<br>+ 0.15 M TRH | DMPC<br>+ 20 wt.% PEG |
|----------|-------|----------------------|-----------------------|
| sample 1 | 1.17  | 2.18                 | 3.61                  |
| sample 2 | 0.983 | 2.03                 | 1.65                  |
| sample 3 | 1.28  | 2.64                 | 1.13                  |

**Table SI 2:** Mean deviation of the Caillé analysis of the data at 35 °C and 1 bar obtained at beamline ID02 of the ESRF.

|          | DMPC  | DMPC<br>+ 0.15 M TRH | DMPC<br>+ 15 wt.% PEG |
|----------|-------|----------------------|-----------------------|
| sample 1 | 0.440 | 0.241                | 0.138                 |
| sample 2 | 0.433 | 0.136                | 0.136                 |
